# Supplementary material for: Aromatic amine electrochemical sensors based on a Co-MOF: a hydrogen bond-induced specific response
Source: Royal Society of Chemistry journal article supplement (doi:10.1039/d2dt02049a), 2022-01-01
Supplement: d2dt02049a1.pdf [file d2dt02049a1.pdf]

## Supplementary Information

### **Aromatic amine electrochemical sensors based on a Co-MOF: a hydrogen bond-induced specific response**

Xiao-qin Wu, Ze-yu Yang, Xiao-jie Sang, Xin-xin Tian\* and Xuehong Wei\*

#### **1. Chemicals and Instrumentation**

Hexahydrate cobalt nitrate (II) ( $\text{Co}(\text{NO}_3)_2 \cdot 6\text{H}_2\text{O}$ ), 2,5-thiophene dicarboxylic acid ( $\text{H}_2\text{L}$ ), 2,2-bipyridine (bipy), 1, 3-dinitrobenzene(m-DNB), 2, 4-dinitroaniline (2, 4-DNA), 4-nitro-o-phenylenediamine(4-NOPD), p-nitroaniline(p-NA) and N,N-dimethyl acetamide (DMA) were commercially available and used directly as provided without further purification.

The powder X-ray diffraction (PXRD) patterns were collected by a D/Max-2500 Advance X-ray diffractometer (Bruker, Germany) from  $5^\circ$  to  $50^\circ$ . Thermogravimetric analysis (TGA) was carried out in the temperature range of  $50\text{--}800^\circ\text{C}$  at a heating rate of  $10^\circ\text{C min}^{-1}$  in an air atmosphere with a flow rate of  $30\text{ mL min}^{-1}$  using a NETZSCH TG 209 (Netzsch instruments, Germany). The Fourier Transform Infrared Spectrometer spectra (FTIR) were obtained with a Bruker Tensor 27 infrared micro-spectrometer (Bruker, Germany).

## 2. X-ray crystallography

The X-ray single crystal diffraction data were collected with a Bruker D8 Venture diffractometer (Bruker, Germany) at room temperature (real-time temperature 301 K) using graphite monochromatic Mo K $\alpha$  radiation ( $\lambda = 0.71073 \text{ \AA}$ ). The structures were solved by SHELXT (direct methods) and refined by SHELXL (full matrix least-squares techniques)<sup>1</sup> in the Olex2 package.<sup>2</sup>

Table S1. Crystal data and structure refinements for **Co-1**

| <b>Co-1</b> (CCDC number: 2246519)               |                                                                                               |
|--------------------------------------------------|-----------------------------------------------------------------------------------------------|
| formula                                          | C <sub>22</sub> H <sub>16</sub> Co <sub>2</sub> N <sub>2</sub> O <sub>10</sub> S <sub>2</sub> |
| M, g mol <sup>-1</sup>                           | 650.35                                                                                        |
| crystalsyst                                      | Triclinic system                                                                              |
| space group                                      | P-1                                                                                           |
| <i>a</i> / $\text{\AA}$                          | 11.1342(4)                                                                                    |
| <i>b</i> / $\text{\AA}$                          | 11.1512(4)                                                                                    |
| <i>c</i> / $\text{\AA}$                          | 15.5072(6)                                                                                    |
| $\alpha$ / deg                                   | 84.2880(10)                                                                                   |
| $\beta$ / deg                                    | 87.7790(10)                                                                                   |
| $\gamma$ / deg                                   | 86.1610(10)                                                                                   |
| <i>V</i> / $\text{\AA}^3$                        | 1910.51(12)                                                                                   |
| <i>Z</i>                                         | 2                                                                                             |
| reflns collected                                 | 22961                                                                                         |
| Unique reflns                                    | 6719                                                                                          |
| <i>R</i> 1 [ <i>I</i> > 2 $\sigma$ ( <i>I</i> )] | 0.0442                                                                                        |
| <i>wR</i> <sub>2</sub> (all data)                | 0.1419                                                                                        |

### 3. PXRD test of Co-1 after immersing in water 1 h

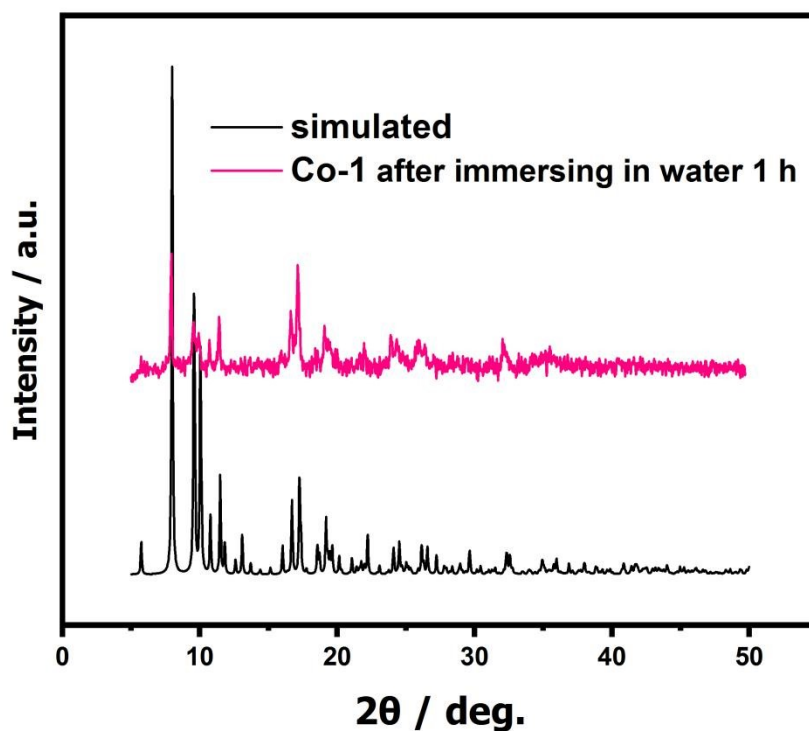

Fig. S1. PXRD graphs of Co-1 simulated by the single crystal data or after immersing in water for 1 h.

### 4. Thermo gravimetric analysis (TGA)

TGA results show that the weight loss of about 3% observed between 0-100°C was ascribed to volatilization of two water molecule and the weight loss of 19.7% observed between 100-200°C was ascribed to volatilization of one DMA molecule in the lattice. When the temperature in the range from 200 to 300°C, the curve is in the platform stage, indicating that Co-1 can exist stably in this temperature range and when the temperature reaches 350°C, the curve drops sharply, Co-1 crystals begin to decompose.

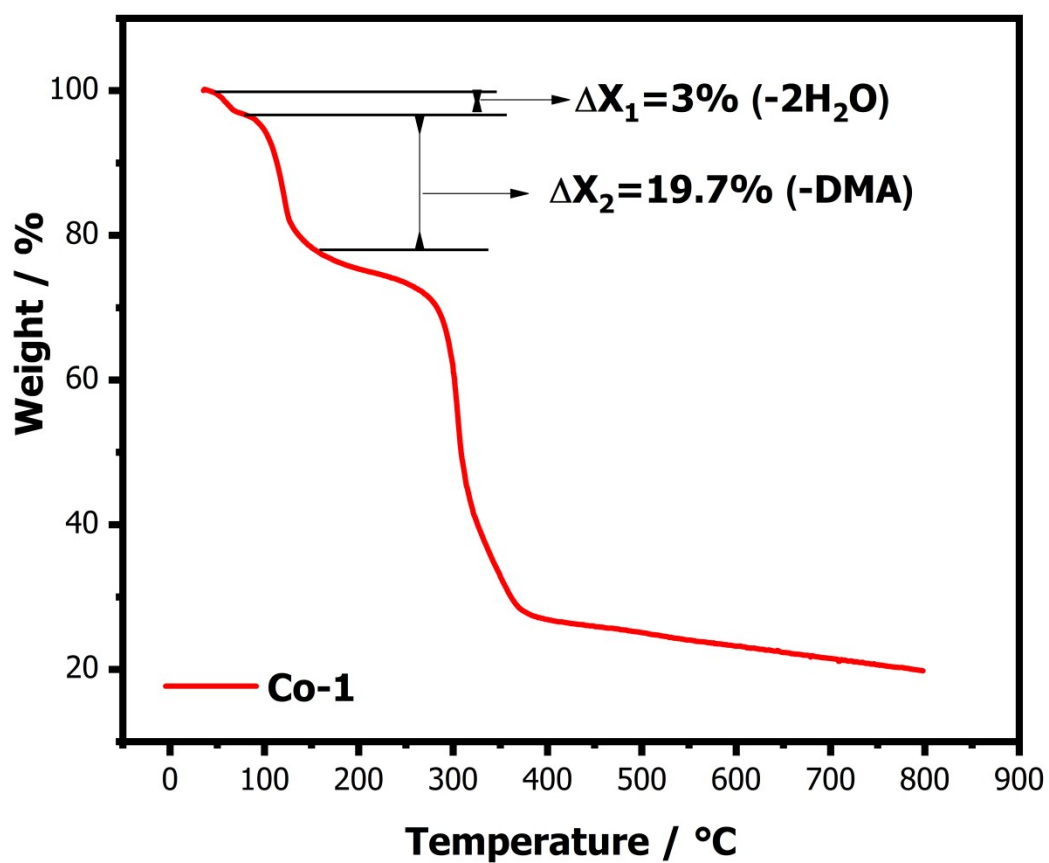

Fig. S2. TGA graphs of Co-1

## 5. The protective effect of nafion on Co-1

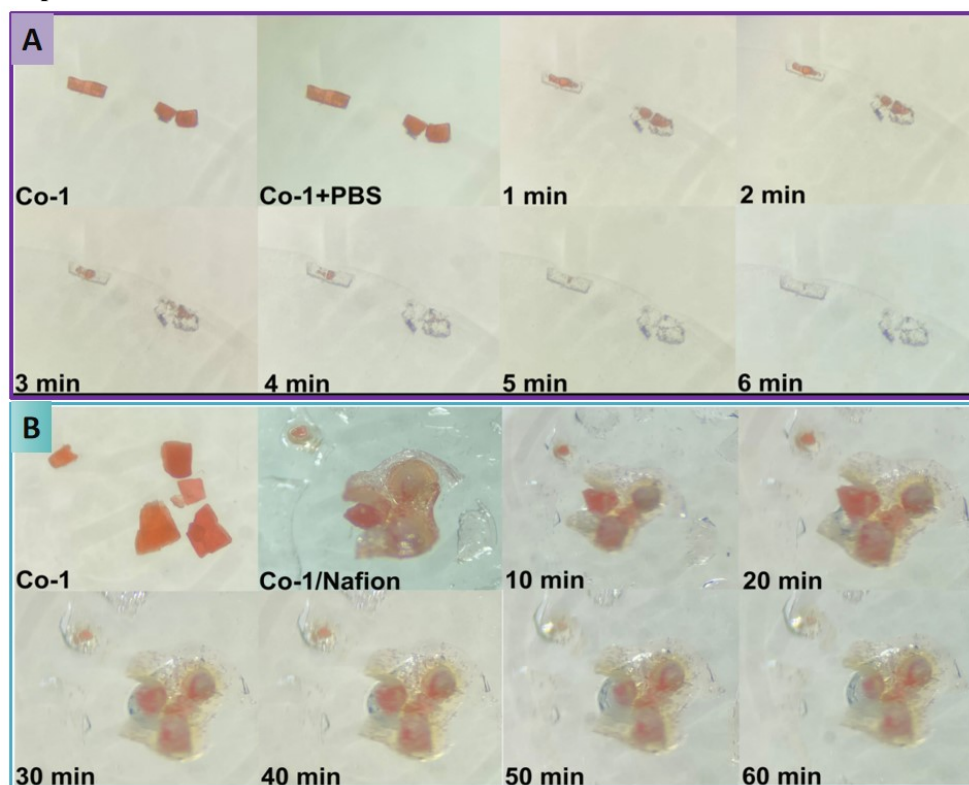

Fig. S3. (A) the microscopic pictures of **Co-1** immersed in phosphate buffer solution (pH=6.8) for six minutes; (B) the microscopic pictures of **Co-1/nafion** immersed in phosphate buffer solution (pH=6.8) for one hour.

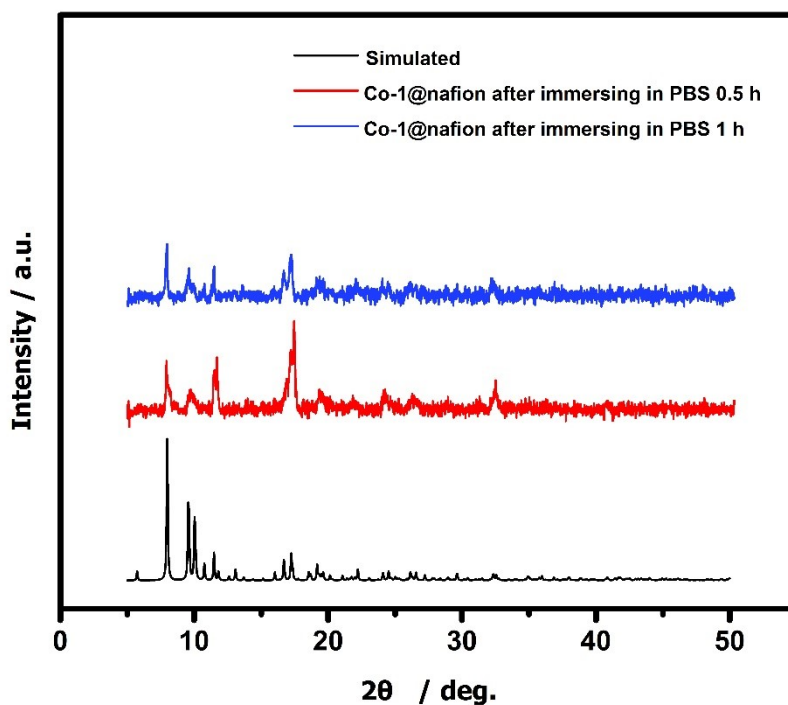

Fig. S4. PXRD graphs of **Co-1** simulated by the single crystal data or after immersing in PBS for 0.5 h, 1 h.

## 6. The Fourier Transform Infrared Spectrometer (FTIR) spectra

The FT-IR spectra of Co-1 (KBr,  $\text{cm}^{-1}$ ): 671(m), 772(s), 797(m), 839(m), 888(w), 965(w), 1015(w), 1077(w), 1106(m), 1158(w), 1224(w), 1252(w), 1358(s), 1389(s), 1435(w), 1508(w), 1576(s), 1610(s), 1654(m); The FT-IR spectra of 2,2-bipy (KBr,  $\text{cm}^{-1}$ ): 653(m), 750(s), 894(w), 992(m), 1040(m), 1063(w), 1084(m), 1139(w), 1212(w), 1251(m), 1416(m), 1450(m), 1557(m), 1578(m); The FT-IR spectra of H<sub>2</sub>L (KBr,  $\text{cm}^{-1}$ ): 681(w), 750(w), 850(m), 914(m), 1038(m), 1101(w), 1229(m), 1260(m), 1340(w), 1412(m), 1525(m), 1658(m).

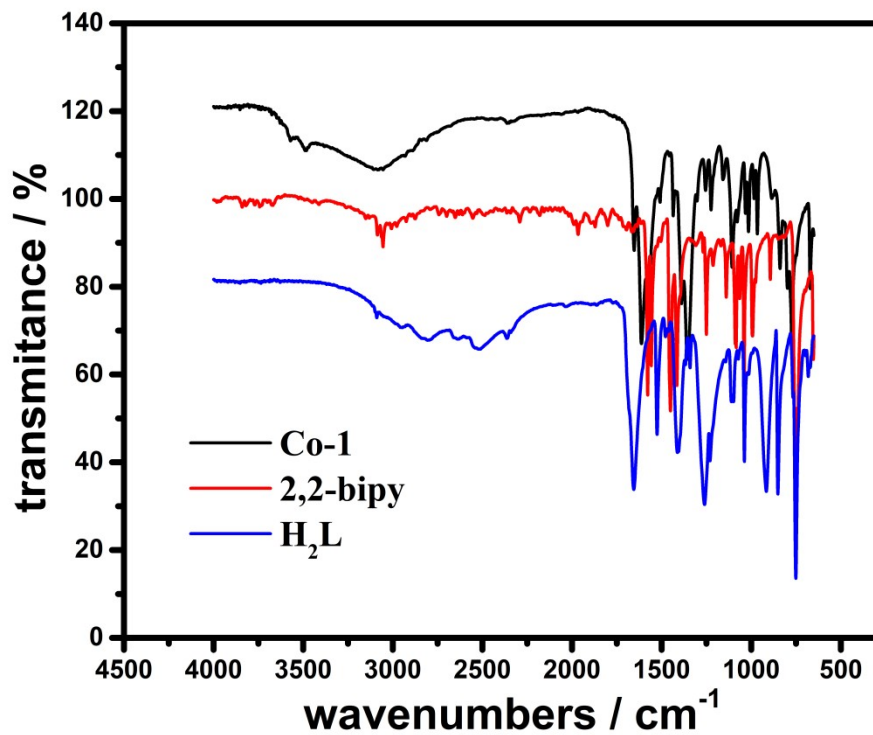

Fig. S5. The FT-IR spectra of Co-1, 2,2-bipy and H<sub>2</sub>L.

## 7. Electrochemical Section of Co-1/GCE

A CHI660e electrochemical workstation (Chenhua Instrument, Shanghai, China) was used for electrochemical measurements with a three-electrode system: the working electrode was the bare glassy carbon electrode (GCE) or Co-1 modified GCE, Co-1/GCE. The counter electrode was a platinum wire and the reference electrode was an Hg/HgCl<sub>2</sub>/KCl electrode. Electrolyte: Phosphoric acid buffer solution (PBS, pH=6.86); All electrochemical studies were carried out at room temperature and under nitrogen surroundings.

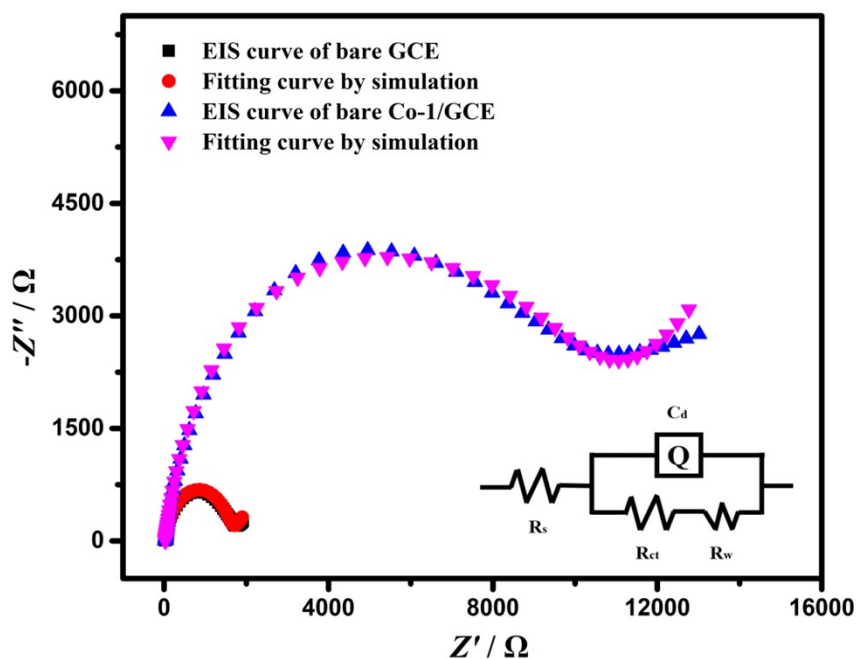

Fig. S6. Nyquist plots of impedance spectra as the bare GCE and Co-1/GCE.

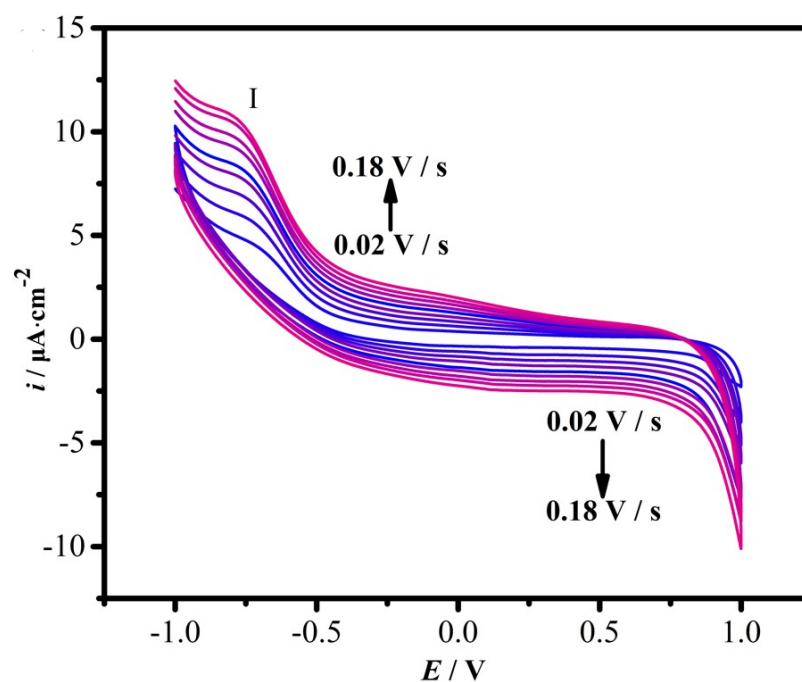

Fig. S7. CVs at Co-1/GCE with different scan rates in the range from 0.02 V/s ~ 0.18 V/s.

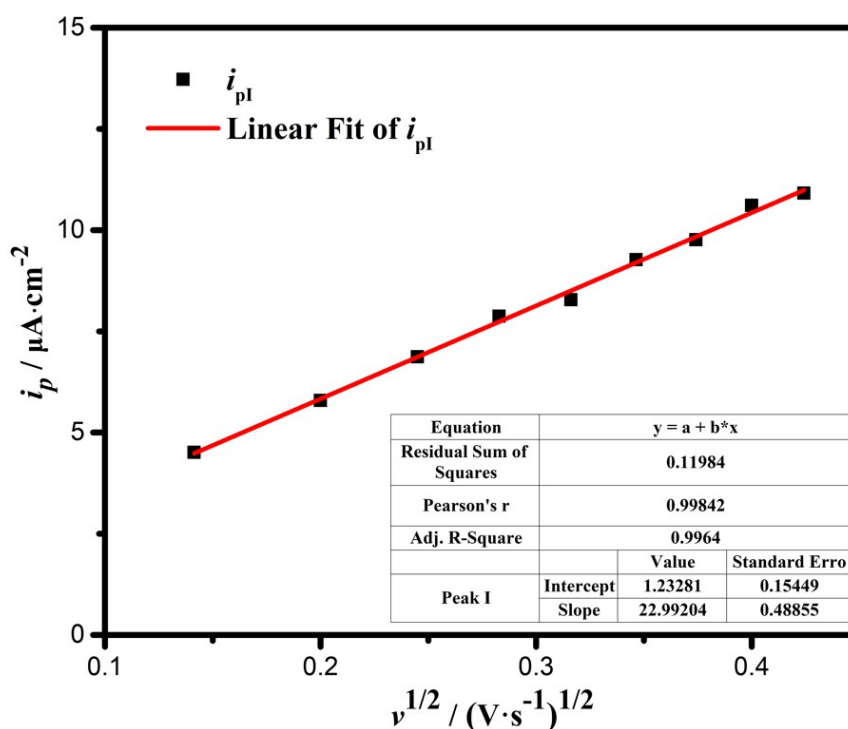

Fig. S8. Plots and parameters of  $i_{p,1}$  vs square root of scan rates  $v^{1/2}$ .

## 8. Methods and Model of DFT calculations

Spin-polarized and periodic density functional theory (DFT) calculations were carried out with the Vienna *ab initio* simulation package (VASP)<sup>3,4</sup>. The generalized gradient approximation in the Perdew-Burke-Ernzerhof (GGA-PBE) functional<sup>5,6</sup> was used to treat the electron exchange and correlation energies. The dispersion interactions (D3 correction) were included in the geometry optimization.<sup>7</sup> The cut off energy was set up to 400 eV. The convergence criterion of force and energy for the geometry optimization was 0.02 eV/Å,  $10^{-4}$  eV, respectively.

The MOF cell was obtained by experimental characterization and optimized using  $3 \times 3 \times 2$  Monkhorst-Pack k-point sampling. The lattice constant is  $a = 11.1342$  Å,  $b = 11.1512$  Å,  $c = 15.5072$  Å,  $\alpha = 84.288^\circ$ ,  $\beta = 87.779^\circ$ ,  $\gamma = 86.161^\circ$ . All atoms were allowed to relax.

The adsorption energy ( $E_{\text{ads}}$ ) of guest molecule (A) is calculated using  $E_{\text{ads}} = E(\text{A/MOF}) - E(\text{A}) - E(\text{MOF})$ , where  $E(\text{A/MOF})$  is the total energy of the MOF model with guest molecule A in its equilibrium geometry,  $E(\text{A})$  is the total energy of the guest molecule in gas phase,  $E(\text{MOF})$  is the total energy of the used MOF cell.



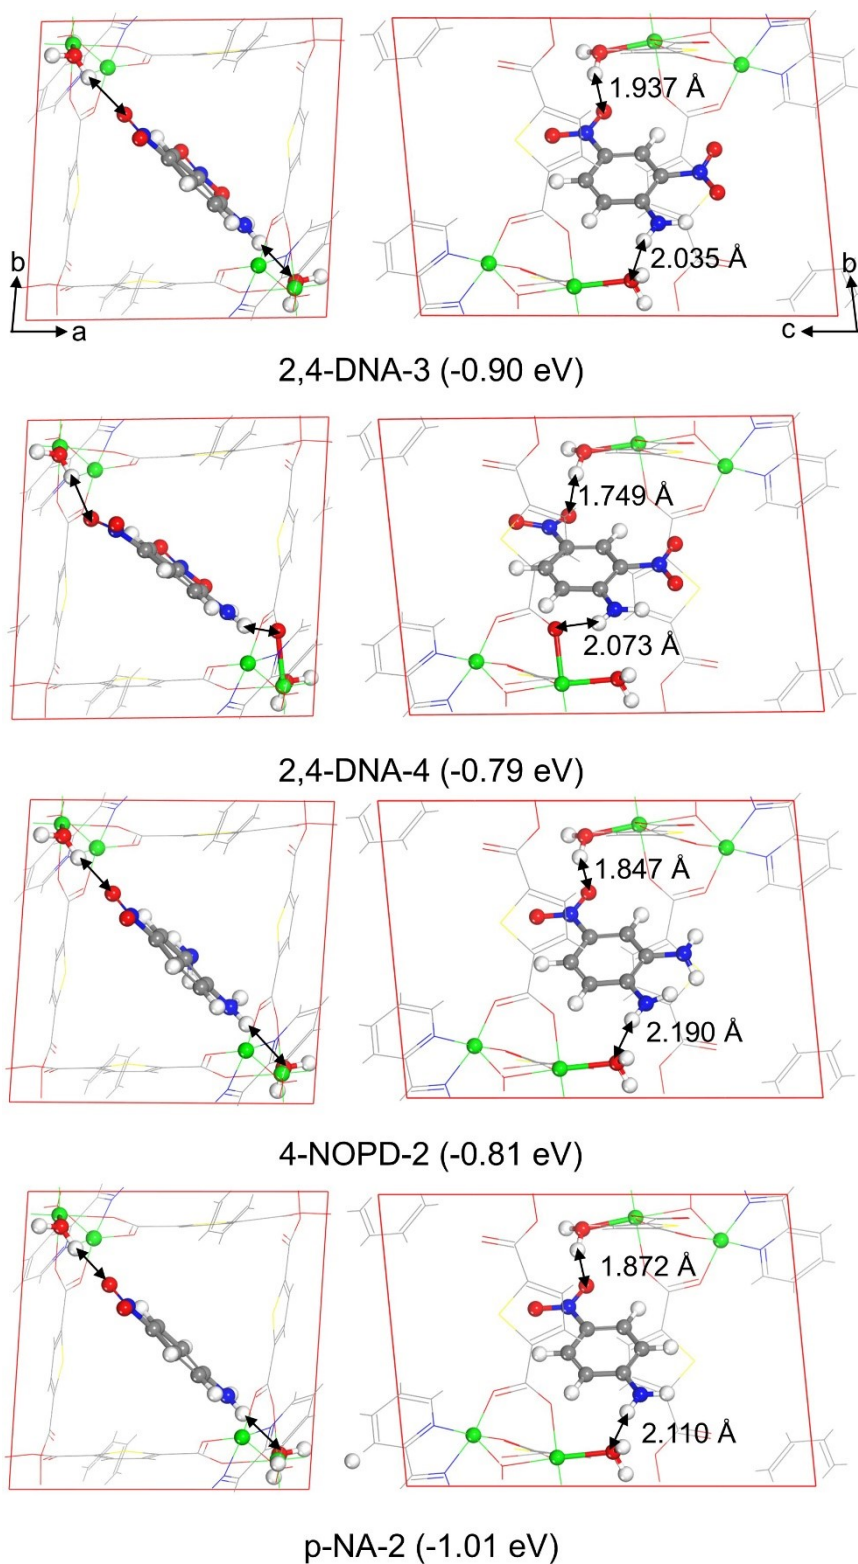

Fig. S9. The structures of 2,4-DNA, 4-NOPD and p-NA interacting with **Co-1** skeleton through both NO<sub>2</sub> and NH<sub>2</sub> group (view from different direction).

9. Electrochemical Sensing behaviors of Co-1/GCE

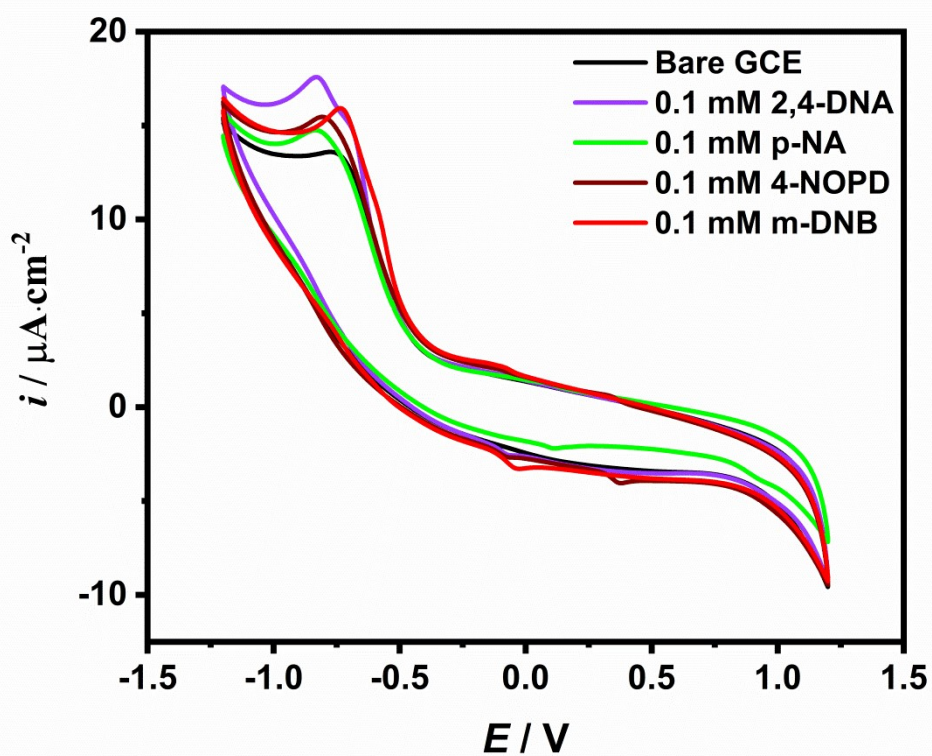

Fig. S10. CVs of bare GCE in PBS solution with 0.1 mM 2,4-DNA, 0.1 mM p-NA, 0.1 mM 4-NOPD or 0.1 mM m-DNB.

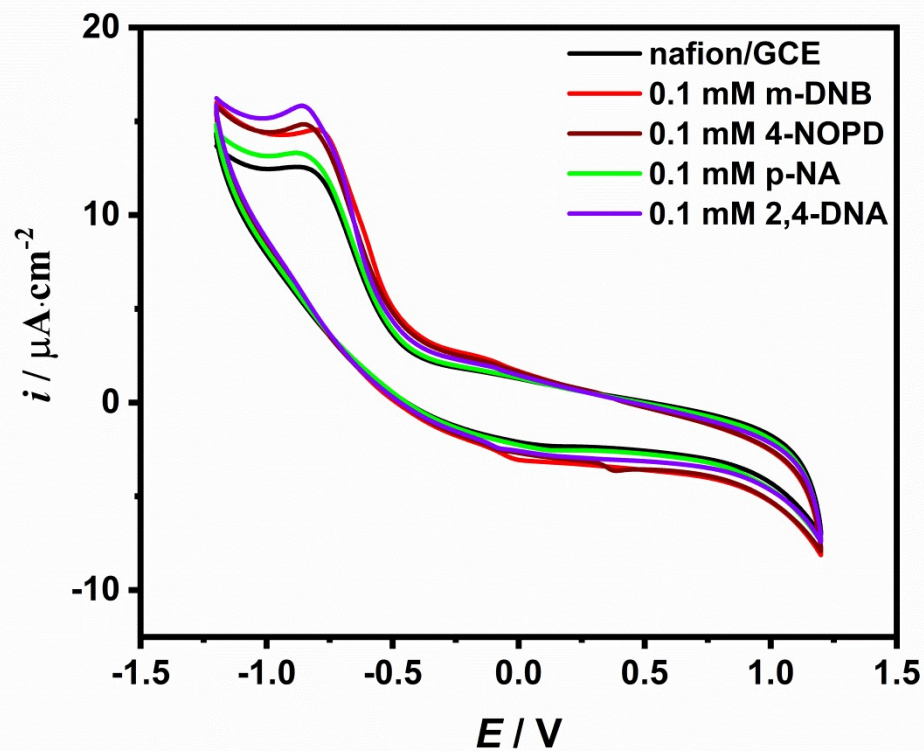

Fig. S11. CVs of Nafion/GCE in PBS solution with 0.1 mM 2,4-DNA, 0.1 mM p-NA, 0.1 mM 4-NOPD or 0.1 mM m-DNB.

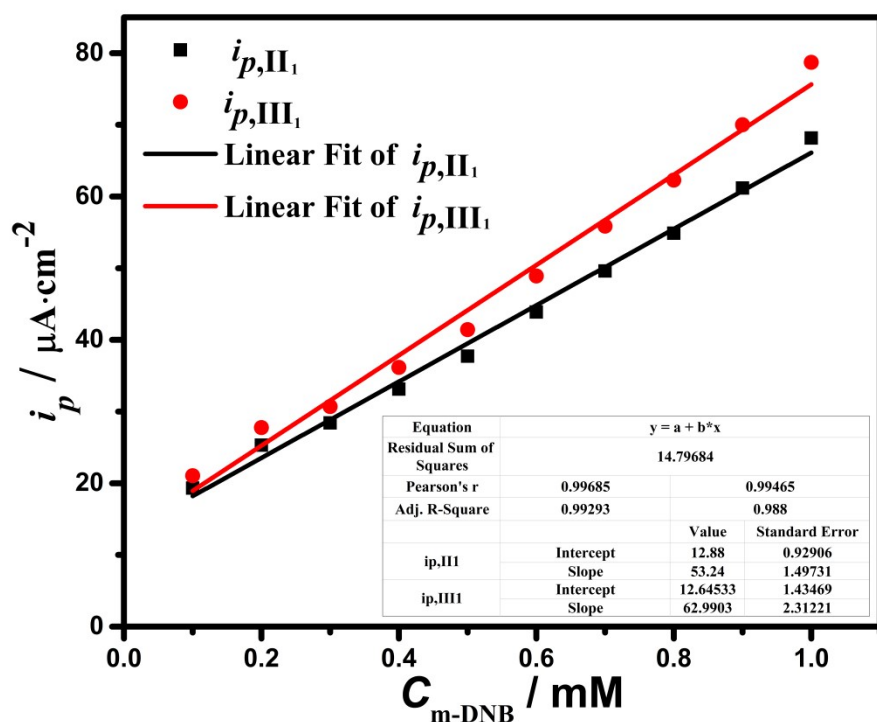

Fig. S12. The calibration plot of current intensities  $i_{p,II1}$  and  $i_{p,III1}$  vs the different concentrations of m-DNB from 0.1~1.0 mM.

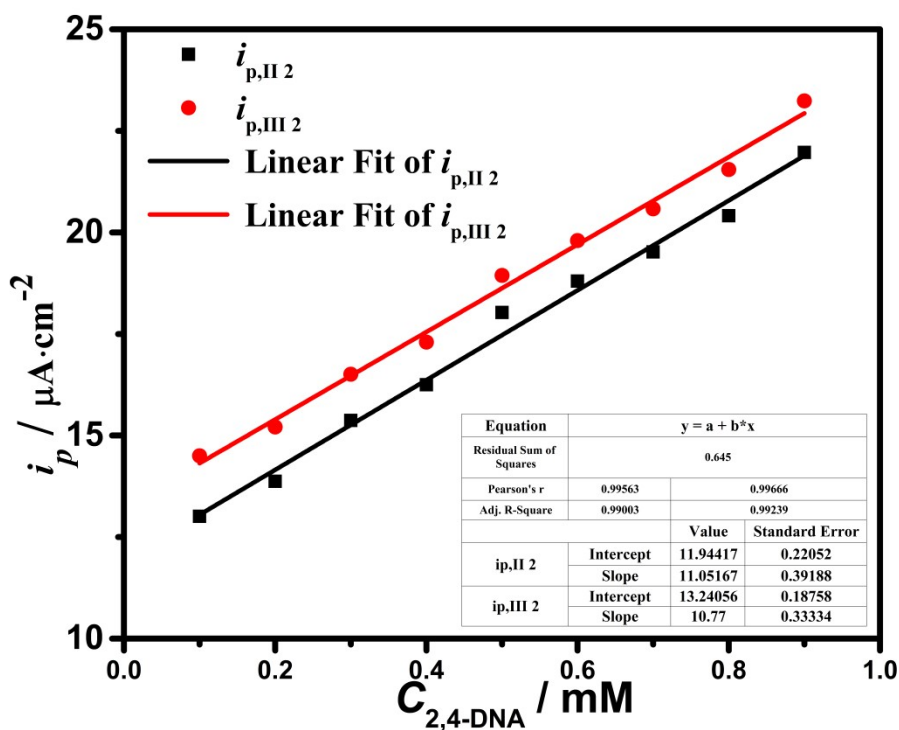

Fig. S13. The calibration plot of current intensities  $i_{p,II2}$  and  $i_{p,III2}$  vs the different concentrations of 2,4-dinitroaniline from 0.1~0.9 mM.

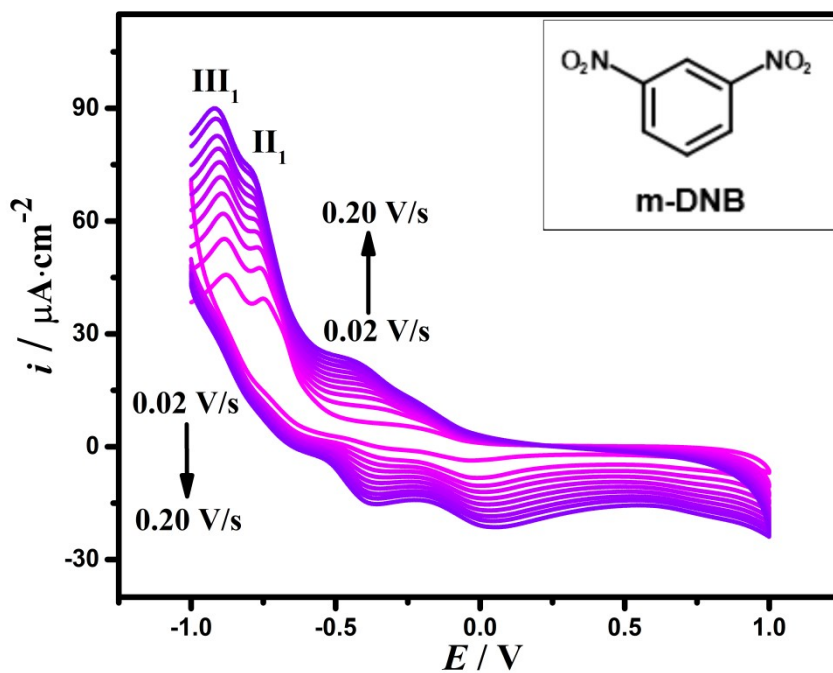

Fig. S14. CVs at Co-1/GCE in PBS (pH=6.86) containing 1.0 mM m-DNB at different scan rates from 0.02 to 0.2  $\text{V}\cdot\text{s}^{-1}$ ;

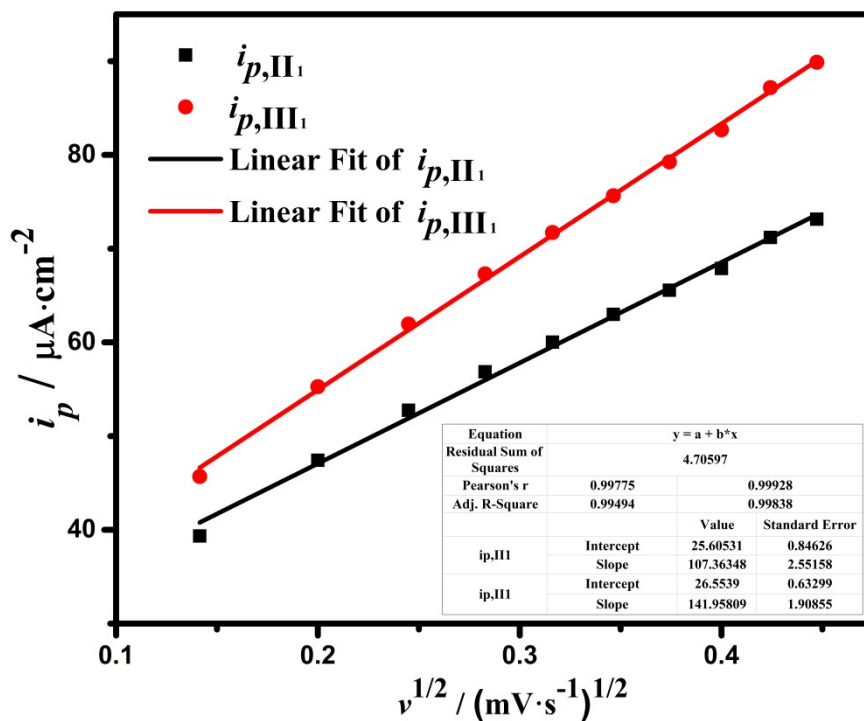

Fig. S15. The calibration plot of current intensities  $i_{p,II_1}$  and  $i_{p,III_1}$  vs the square root of scan rate  $v^{1/2}$ .

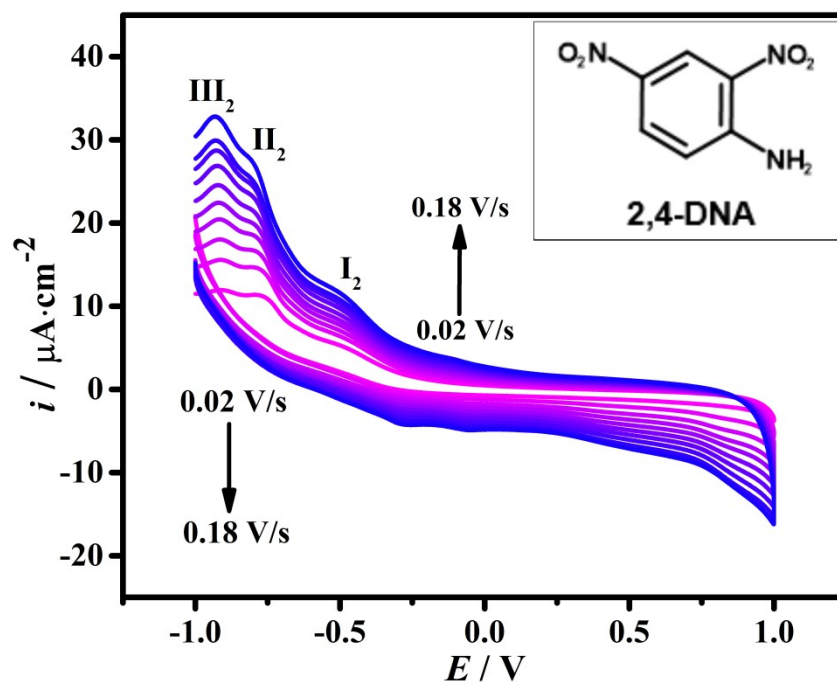

Fig. S16. CVs at Co-1/GCE in PBS (pH=6.86) containing 0.9 mM 2,4-DNA at different scan rates from 0.02 to 0.2 V·s<sup>-1</sup>;

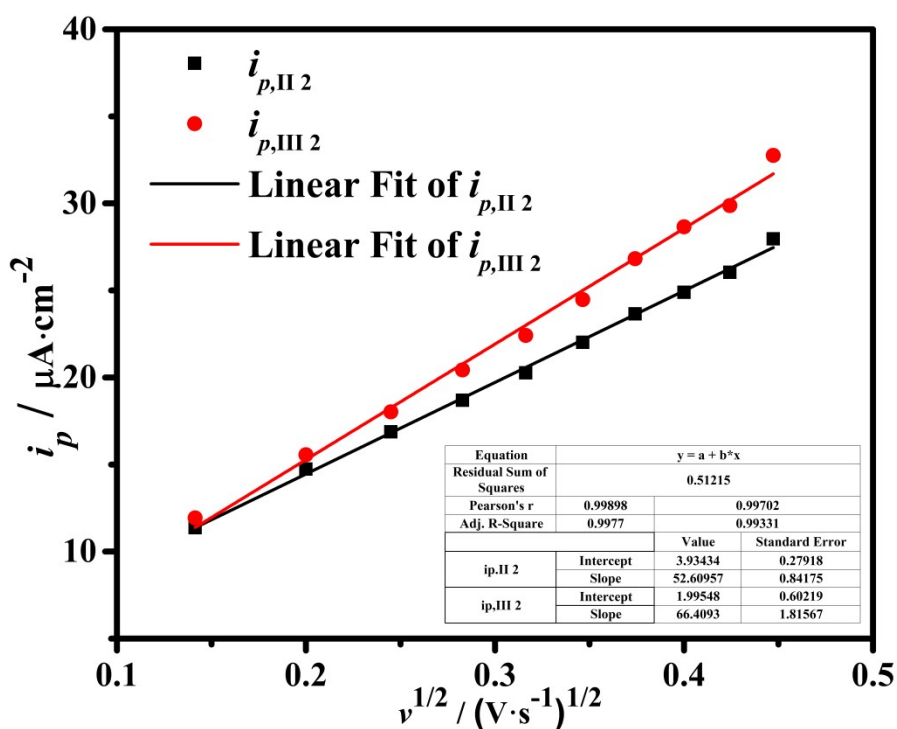

Fig. S17. The calibration plot of current intensities  $i_{p,II 2}$  and  $i_{p,III 2}$  vs the square root of scan rate  $v^{1/2}$ .

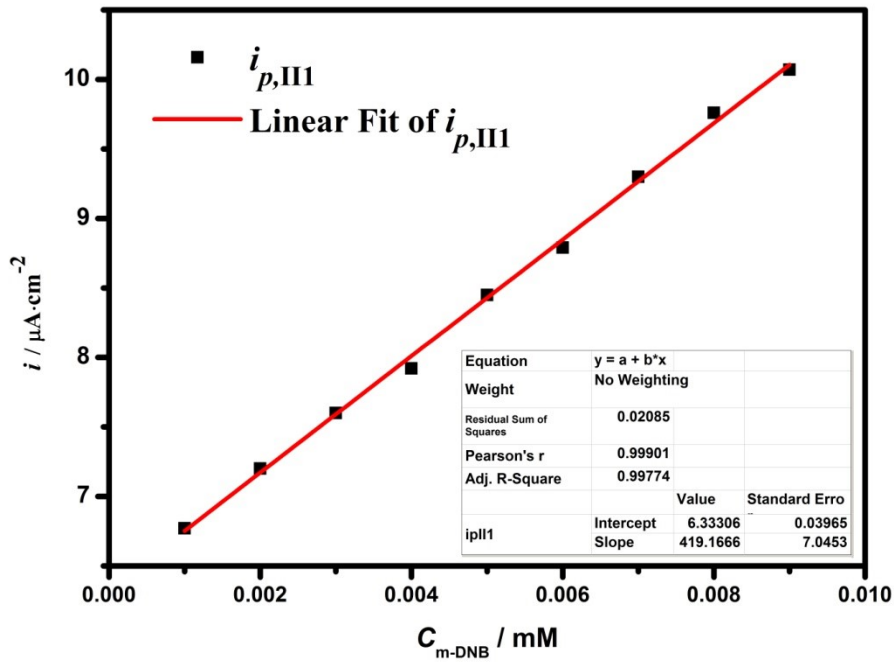

Fig. S18. The calibration plot of current intensities  $i_{p,II1}$  vs the concentration of m-DNB based on DPV curve.

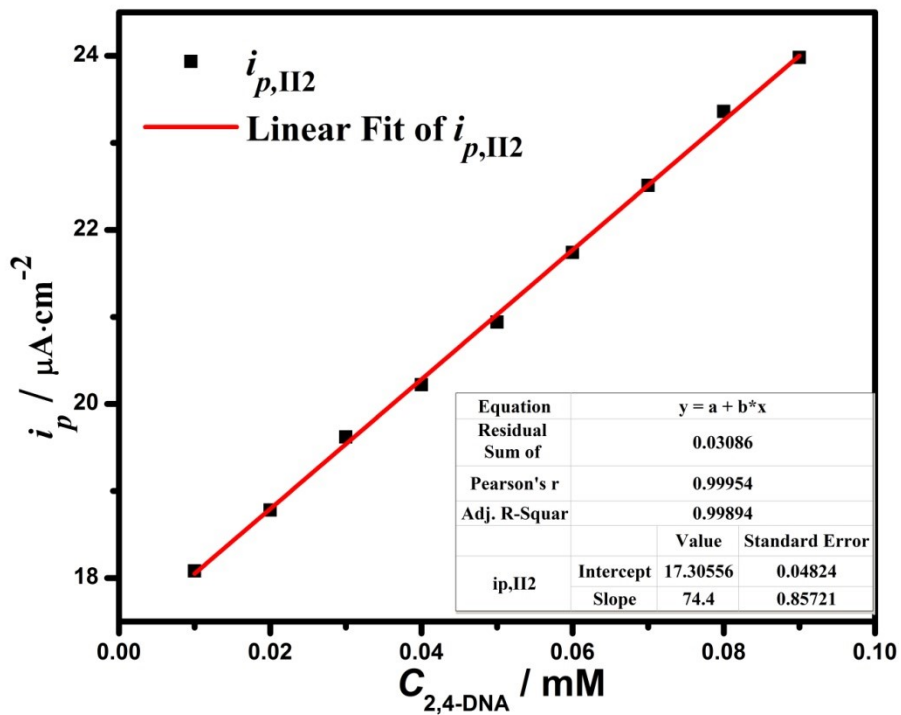

Fig. S19. The calibration plot of current intensities  $i_{p,II2}$  vs the concentration of 2,4-DNA based on DPV curve.

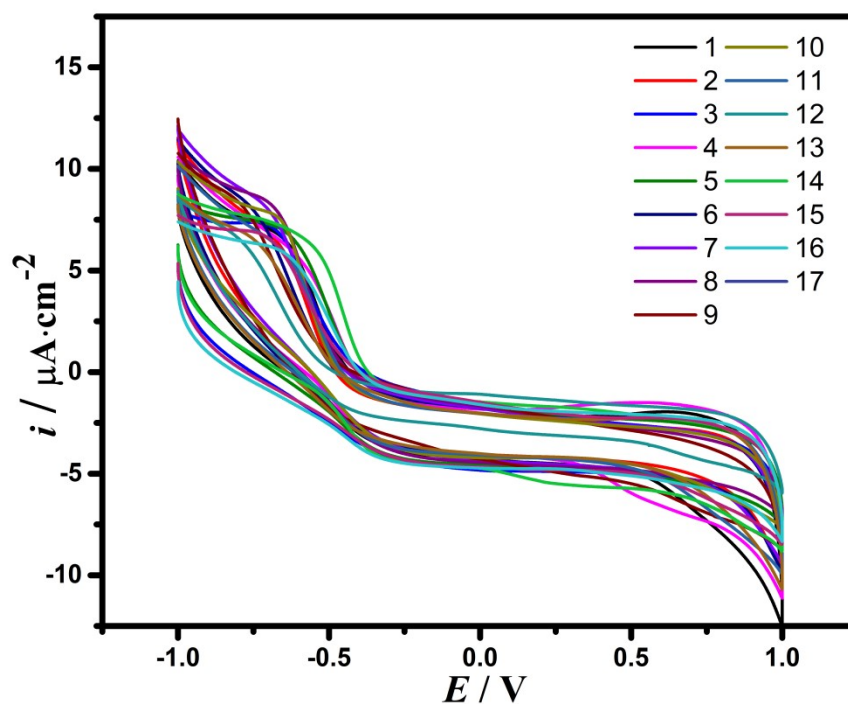

Fig. S20. CVs of Co-1/GCE in PBS solution with 0.1 mM different interferents (1-17): **1.** benzamide; **2.**  $\beta$ -naphthylamine; **3.**  $\alpha$ -naphthylamine; **4.** 2-nitrobenzaldehyde; **5.** 3-nitrobenzaldehyde; **6.** 4-nitrobenzaldehyde; **7.** 2-nitrobenzoic acid; **8.** 3-nitrobenzoic acid; **9.** 4-methylbenzyl alcohol; **10.** 2-acetylpyridine; **11.** benzonitrile; **12.** 4-aminobenzoic acid; **13.** phthalic acid; **14.** 2-chlorobenzaldehyde; **15.** aniline; **16.** 2,4,6-trimethylaniline; **17.** benzene-1,3-diamine.

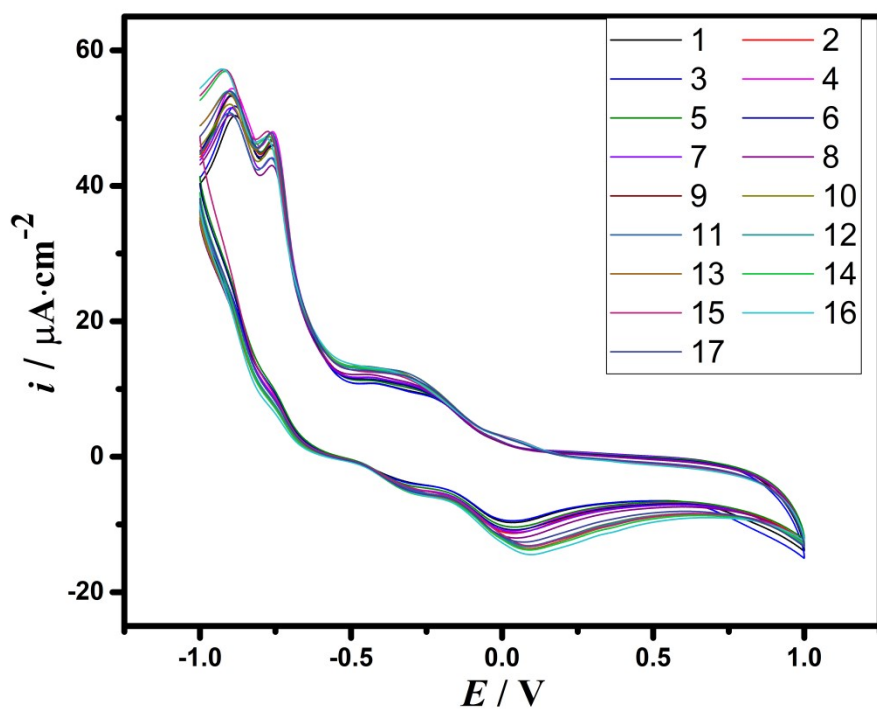

Fig. S21. CVs of Co-1/GCE in PBS solution with 0.5 mM m-DNB containing 0.1 mM different interferents (1-17): **1.** benzamide; **2.**  $\beta$ -naphthylamine; **3.**  $\alpha$ -naphthylamine; **4.** 2-nitrobenzaldehyde; **5.** 3-nitrobenzaldehyde; **6.** 4-nitrobenzaldehyde; **7.** 2-nitrobenzoic acid; **8.** 3-nitrobenzoic acid; **9.** 4-methylbenzyl alcohol; **10.** 2-acetylpyridine; **11.** benzonitrile; **12.** 4-aminobenzoic acid; **13.** phthalic acid; **14.** 2-chlorobenzaldehyde; **15.** aniline; **16.** 2,4,6-trimethylaniline; **17.** benzene-1,3-diamine.



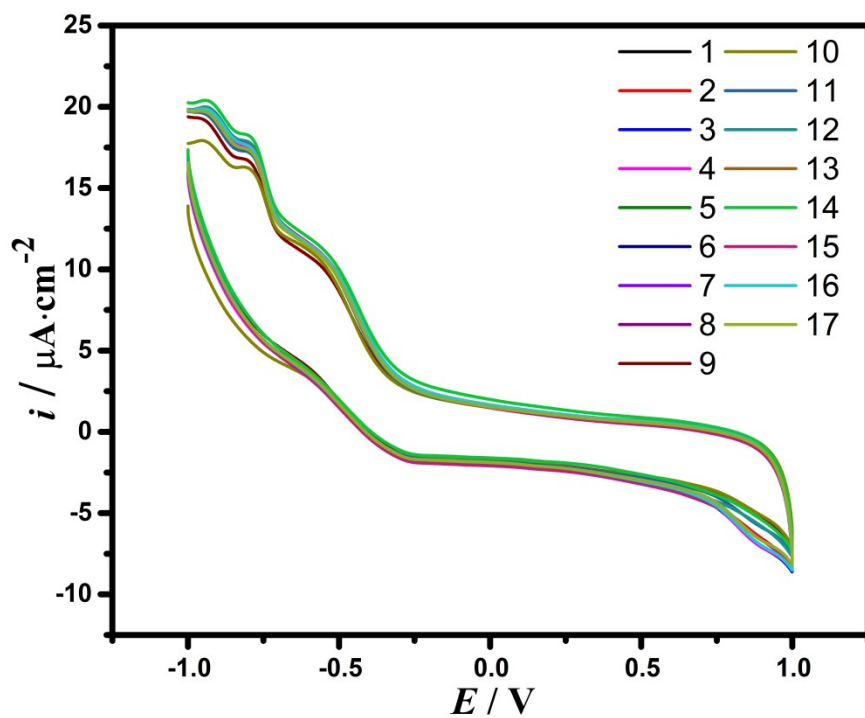

Fig. S22. CVs of Co-1/GCE in PBS solution with 0.5 mM 2,4-DNA containing 0.1 mM different interferents (1-17): **1.** benzamide; **2.**  $\beta$ -naphthylamine; **3.**  $\alpha$ -naphthylamine; **4.** 2-nitrobenzaldehyde; **5.** 3-nitrobenzaldehyde; **6.** 4-nitrobenzaldehyde; **7.** 2-nitrobenzoic acid; **8.** 3-nitrobenzoic acid; **9.** 4-methylbenzyl alcohol; **10.** 2-acetylpyridine; **11.** benzonitrile; **12.** 4-aminobenzoic acid; **13.** phthalic acid; **14.** 2-chlorobenzaldehyde; **15.** aniline; **16.** 2,4,6-trimethylaniline; **17.** benzene-1,3-diamine.

## 10. Comparison of different detection methods in the recognition efficiency of m-DNB

Table S2. Comparison of different detection methods in the recognition efficiency of m-DNB

| Method/materials                             | Detection range       | LOD                  | Ref       |
|----------------------------------------------|-----------------------|----------------------|-----------|
| Colorimetric aqueous medium dual chemosensor | 0.5–5.0 $\mu\text{L}$ | 0.084 ppb            | 8         |
| Photoluminescent sensor                      | 0-100 ppm             | 6.109 ppm            | 9         |
| Tb-MOF sensor                                | 8-240 $\mu\text{M}$   | 1.89 $\mu\text{M}$   | 10        |
| Cu-MOF Fluorescence sensor                   | 25-45 ppb             | 0.7544 ppb           | 11        |
| Electrochemical sensor/Co-MOF                | 0.01 mM-0.09 mM       | 0.0286 $\mu\text{M}$ | This work |

### Note after first publication

This electronic supplementary information replaces the version published on 17th October 2022, which contained errors in the crystallographic data and the test temperature of X-ray single crystal diffraction for **Co-1**.

<sup>1</sup> G. Sheldrick, *Acta Cryst.* 2008, **64** (1), 112-122.

<sup>2</sup> O. V. Dolomanov, L. J. Bourhis, R. J. Gildea, J. A. K. Howard and H. Puschmann, *J. Appl. Cryst.* 2009, **42** (2), 339-341.

<sup>3</sup> G. Kresse and J. Furthmüller, *Comput. Mater. Sci.* 1996, **6**, 15-50.

<sup>4</sup> G. Kresse and J. Furthmüller, *Phys. Rev. B* 1996, **54**, 11169-11186.

<sup>5</sup> J. P. Perdew, K. Burke and M. Ernzerhof, *Phys. Rev. Lett.* 1997, **78**, 1396.

<sup>6</sup> J. P. Perdew, K. Burke and M. Ernzerhof, *Phys. Rev. Lett.* 1996, **77**, 3865-3868.

<sup>7</sup> S. Grimme, J. Antony, S. Ehrlich and H. Krieg, *J. Chem. Phys.* 2010, **132**, 154104.

<sup>8</sup> S. Shakya, I. M. Khan and M. Ahmad, *J. Photoch. Photobio. A* 2020, **92**, 112402.

<sup>9</sup> L. Tashi, R. Singhaal, M. Kumar and H. N. Sheikh, *New J. Chem.* 2020, **44**, 19908-19923.

<sup>10</sup> J. F. Guo, M. Y. Zhang, Q. Z. Guo, G. P. Yan and L. J. Liu, *Inorg. Chim. Acta*, 2021, **525**, 120454.

<sup>11</sup> D. Garg, H. Rekhi, H. Kaur, K. Singh and A. K. Malik, *J. Fluoresc.* 2022, **32**, 1171-1188.
